# Supplementary material
Source: PubMed Central journal article supplement (PMC9295021)
Supplement: jamaneurol-e221858-s001.pdf [file jamaneurol-e221858-s001.pdf]

## Supplementary Online Content

Hunter BR, Wang AZ, Bucca AW, et al. Efficacy of benzodiazepines or antihistamines for patients with acute vertigo: a systematic review and meta-analysis. *JAMA Neurol*. Published online July 18, 2022. doi:10.1001/jamaneurol.2022.1858

**eAppendix.** PubMed Search

**eFigure 1.** Sensitivity Analysis for Primary Outcomes of 2 Additional Studies Reporting Visual Analog Score Changes at 2 Hours But Lacking SDs

**eFigure 2.** Two-Hour Secondary End Points

**eFigure 3.** Antihistamines vs Placebo or No Treatment at 1 Week and 1 Month

**eFigure 4.** Adverse Events

**eTable.** Nystagmography Studies

**eReferences**

This supplementary material has been provided by the authors to give readers additional information about their work.

## eAppendix. PubMed Search

(((((("meclizine"[MeSH Terms] OR "meclizine"[All Fields]) OR ("alprazolam"[MeSH Terms] OR "alprazolam"[All Fields])) OR ("antazoline"[MeSH Terms] OR "antazoline"[All Fields])) OR ("anthramycin"[MeSH Terms] OR "anthramycin"[All Fields])) OR ("anti-allergic agents"[Pharmacological Action] OR "anti-allergic agents"[MeSH Terms] OR ("anti-allergic"[All Fields] AND "agents"[All Fields]) OR "anti-allergic agents"[All Fields] OR ("anti"[All Fields] AND "allergic"[All Fields] AND "agents"[All Fields]) OR "anti allergic agents"[All Fields])) OR ("histamine antagonists"[Pharmacological Action] OR "histamine antagonists"[MeSH Terms] OR ("histamine"[All Fields] AND "antagonists"[All Fields]) OR "histamine antagonists"[All Fields] OR "antihistamines"[All Fields])) OR ("meclizine"[MeSH Terms] OR "meclizine"[All Fields] OR "antivert"[All Fields])) OR ("astemizole"[MeSH Terms] OR "astemizole"[All Fields])) OR ("promethazine"[MeSH Terms] OR "promethazine"[All Fields] OR "atosil"[All Fields])) OR ("benzodiazepines"[MeSH Terms] OR "benzodiazepines"[All Fields] OR "benzodiazepine"[All Fields])) OR ("meclizine"[MeSH Terms] OR "meclizine"[All Fields] OR "bonamine"[All Fields])) OR ("bromazepam"[MeSH Terms] OR "bromazepam"[All Fields])) OR ("brompheniramine"[MeSH Terms] OR "brompheniramine"[All Fields])) OR ("burimamide"[MeSH Terms] OR "burimamide"[All Fields])) OR ("cetirizine"[MeSH Terms] OR "cetirizine"[All Fields])) OR ("meclizine"[MeSH Terms] OR "meclizine"[All Fields] OR "chiclida"[All Fields])) OR ("chlordiazepoxide"[MeSH Terms] OR "chlordiazepoxide"[All Fields])) OR ("chlorpheniramine"[MeSH Terms] OR "chlorpheniramine"[All Fields])) OR ("cimetidine"[MeSH Terms] OR "cimetidine"[All Fields])) OR ("cinnarizine"[MeSH Terms] OR "cinnarizine"[All Fields])) OR ("clemastine"[MeSH Terms] OR "clemastine"[All Fields])) OR ("clobazam"[MeSH Terms] OR "clobazam"[All Fields])) OR ("clonazepam"[MeSH Terms] OR "clonazepam"[All Fields])) OR ("clorazepate dipotassium"[MeSH Terms] OR ("clorazepate"[All Fields] AND "dipotassium"[All Fields]) OR "clorazepate dipotassium"[All Fields])) OR ("cyclizine"[MeSH Terms] OR "cyclizine"[All Fields])) OR ("cyproheptadine"[MeSH Terms] OR "cyproheptadine"[All Fields])) OR ("devazepide"[MeSH Terms] OR "devazepide"[All Fields])) OR ("diazepam"[MeSH Terms] OR "diazepam"[All Fields])) OR ("dimenhydrinate"[MeSH Terms] OR "dimenhydrinate"[All Fields])) OR ("dimethindene"[MeSH Terms] OR "dimethindene"[All Fields])) OR ("diphenhydramine"[MeSH Terms] OR "diphenhydramine"[All Fields])) OR ("promethazine"[MeSH Terms] OR "promethazine"[All Fields] OR "diphergan"[All Fields])) OR ("promethazine"[MeSH Terms] OR "promethazine"[All Fields] OR "diprazin"[All Fields])) OR ("doxepin"[MeSH Terms] OR "doxepin"[All Fields])) OR ("doxylamine"[MeSH Terms] OR "doxylamine"[All Fields])) OR ("meclizine"[MeSH Terms] OR "meclizine"[All Fields])) OR ("estazolam"[MeSH Terms] OR "estazolam"[All Fields])) OR ("famotidine"[MeSH Terms] OR "famotidine"[All Fields])) OR ("flumazenil"[MeSH Terms] OR "flumazenil"[All Fields])) OR ("flunarizine"[MeSH Terms] OR "flunarizine"[All Fields])) OR ("flunitrazepam"[MeSH Terms] OR "flunitrazepam"[All Fields])) OR ("flurazepam"[MeSH Terms] OR "flurazepam"[All Fields])) OR ("gaba modulators"[Pharmacological Action] OR "gaba modulators"[MeSH Terms] OR ("gaba"[All Fields] AND "modulators"[All Fields]) OR "gaba modulators"[All Fields])) OR ("meclizine"[MeSH Terms] OR "meclizine"[All Fields])) OR ("histamine antagonists"[Pharmacological Action] OR "histamine antagonists"[MeSH Terms] OR ("histamine"[All Fields] AND "antagonists"[All Fields]) OR "histamine antagonists"[All Fields]) OR

("histamine"[All Fields] AND "antagonist"[All Fields]) OR "histamine antagonist"[All Fields]) OR ("hydroxyzine"[MeSH Terms] OR "hydroxyzine"[All Fields]) OR ("promethazine"[MeSH Terms] OR "promethazine"[All Fields] OR "isopromethazine"[All Fields]) OR ("ketotifen"[MeSH Terms] OR "ketotifen"[All Fields]) OR ("loratadine"[MeSH Terms] OR "loratadine"[All Fields]) OR ("lorazepam"[MeSH Terms] OR "lorazepam"[All Fields]) OR ("meclizine"[MeSH Terms] OR "meclizine"[All Fields]) OR ("medazepam"[MeSH Terms] OR "medazepam"[All Fields]) OR ("methapyrilene"[MeSH Terms] OR "methapyrilene"[All Fields]) OR ("metiamide"[MeSH Terms] OR "metiamide"[All Fields]) OR ("mianserin"[MeSH Terms] OR "mianserin"[All Fields]) OR ("midazolam"[MeSH Terms] OR "midazolam"[All Fields]) OR ("mirtazapine"[MeSH Terms] OR "mirtazapine"[All Fields]) OR ("nitrazepam"[MeSH Terms] OR "nitrazepam"[All Fields]) OR ("nizatidine"[MeSH Terms] OR "nizatidine"[All Fields]) OR ("olanzapine"[MeSH Terms] OR "olanzapine"[All Fields]) OR ("olopatadine hydrochloride"[MeSH Terms] OR ("olopatadine"[All Fields] AND "hydrochloride"[All Fields]) OR "olopatadine hydrochloride"[All Fields]) OR ("ondansetron"[MeSH Terms] OR "ondansetron"[All Fields]) OR ("oxazepam"[MeSH Terms] OR "oxazepam"[All Fields]) OR ("meclizine"[MeSH Terms] OR "meclizine"[All Fields] OR "parachloramine"[All Fields]) OR ("promethazine"[MeSH Terms] OR "promethazine"[All Fields] OR "phenargan"[All Fields]) OR ("pheniramine"[MeSH Terms] OR "pheniramine"[All Fields]) OR ("promethazine"[MeSH Terms] OR "promethazine"[All Fields] OR "phensedyl"[All Fields]) OR ("promethazine"[MeSH Terms] OR "promethazine"[All Fields] OR "pipolfen"[All Fields]) OR ("promethazine"[MeSH Terms] OR "promethazine"[All Fields] OR "pipolphen"[All Fields]) OR ("pirenzepine"[MeSH Terms] OR "pirenzepine"[All Fields]) OR ("prazepam"[MeSH Terms] OR "prazepam"[All Fields]) OR ("promethazine"[MeSH Terms] OR "promethazine"[All Fields] OR "proazamine"[All Fields]) OR ("promethazine"[MeSH Terms] OR "promethazine"[All Fields] OR "promet"[All Fields]) OR ("promethazine"[MeSH Terms] OR "promethazine"[All Fields]) OR ("promethazine"[MeSH Terms] OR "promethazine"[All Fields] OR ("promethazine"[All Fields] AND "hydrochloride"[All Fields]) OR "promethazine hydrochloride"[All Fields]) OR ("promethazine"[MeSH Terms] OR "promethazine"[All Fields] OR "prothazin"[All Fields]) OR ("promethazine"[MeSH Terms] OR "promethazine"[All Fields] OR "pyrethia"[All Fields]) OR ("pyrilamine"[MeSH Terms] OR "pyrilamine"[All Fields]) OR ("ranitidine"[MeSH Terms] OR "ranitidine"[All Fields]) OR ("promethazine"[MeSH Terms] OR "promethazine"[All Fields]) OR ("meclizine"[MeSH Terms] OR "meclizine"[All Fields]) OR ("promethazine"[MeSH Terms] OR "promethazine"[All Fields]) OR ("serotonin antagonists"[Pharmacological Action] OR "serotonin antagonists"[MeSH Terms] OR ("serotonin"[All Fields] AND "antagonists"[All Fields]) OR "serotonin antagonists"[All Fields]) OR ("temazepam"[MeSH Terms] OR "temazepam"[All Fields]) OR ("terfenadine"[MeSH Terms] OR "terfenadine"[All Fields]) OR ("triazolam"[MeSH Terms] OR "triazolam"[All Fields]) OR ("tripelennamine"[MeSH Terms] OR "tripelennamine"[All Fields]) OR ("triprolidine"[MeSH Terms] OR "triprolidine"[All Fields]) AND (((((((("vertigo"[MeSH Terms] OR "vertigo"[All Fields] OR "dizziness"[All Fields] OR "dizziness"[MeSH Terms]) OR ("dizziness"[MeSH Terms] OR "dizziness"[All Fields] OR "dizzy"[All Fields]) OR ("vertigo"[MeSH Terms] OR "vertigo"[All Fields]) OR ("dizziness"[MeSH Terms] OR "dizziness"[All Fields] OR "lightheadedness"[All Fields]) OR ("benign paroxysmal positional vertigo"[MeSH Terms] OR ("benign"[All Fields] AND "paroxysmal"[All Fields] AND "positional"[All Fields] AND "vertigo"[All Fields]) OR "benign paroxysmal positional vertigo"[All Fields]) OR ("benign paroxysmal positional vertigo"[MeSH Terms] OR ("benign"[All Fields] AND

"paroxysmal"[All Fields] AND "positional"[All Fields] AND "vertigo"[All Fields]) OR "benign paroxysmal positional vertigo"[All Fields] OR "bppv"[All Fields])) OR "Benign Paroxysmal Positional Vertigo"[Mesh] OR "Vertigo"[Mesh] OR "Dizziness"[Mesh])

**eFigure 1.** Sensitivity Analysis for Primary Outcomes of 2 Additional Studies Reporting Visual Analog Score Changes at 2 Hours But Lacking SDs

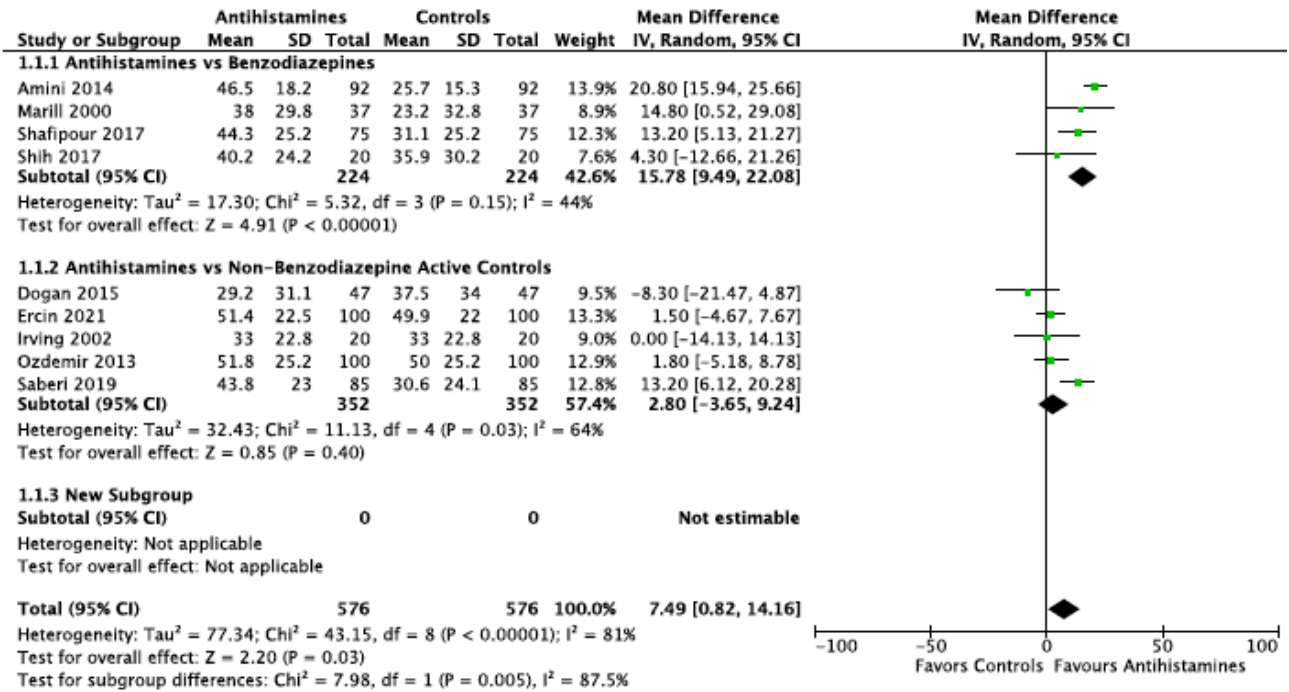

Additional data are from Shafipour et al<sup>1</sup> and Ozdemir et al.<sup>2</sup>

## eFigure 2. Two-Hour Secondary End Points

### Change in Nausea VAS

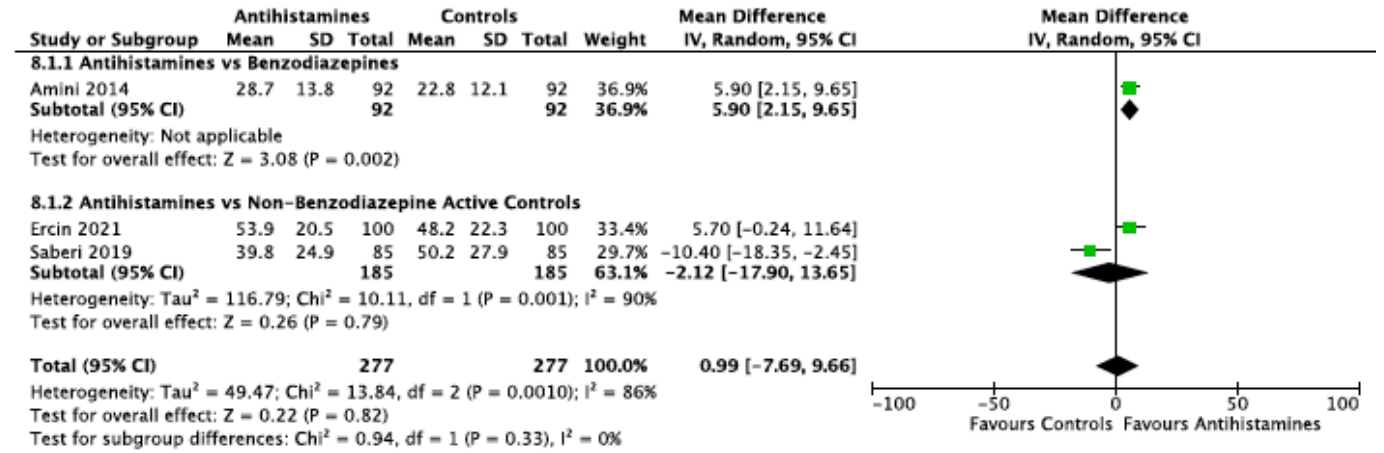

### Need for Rescue Medication

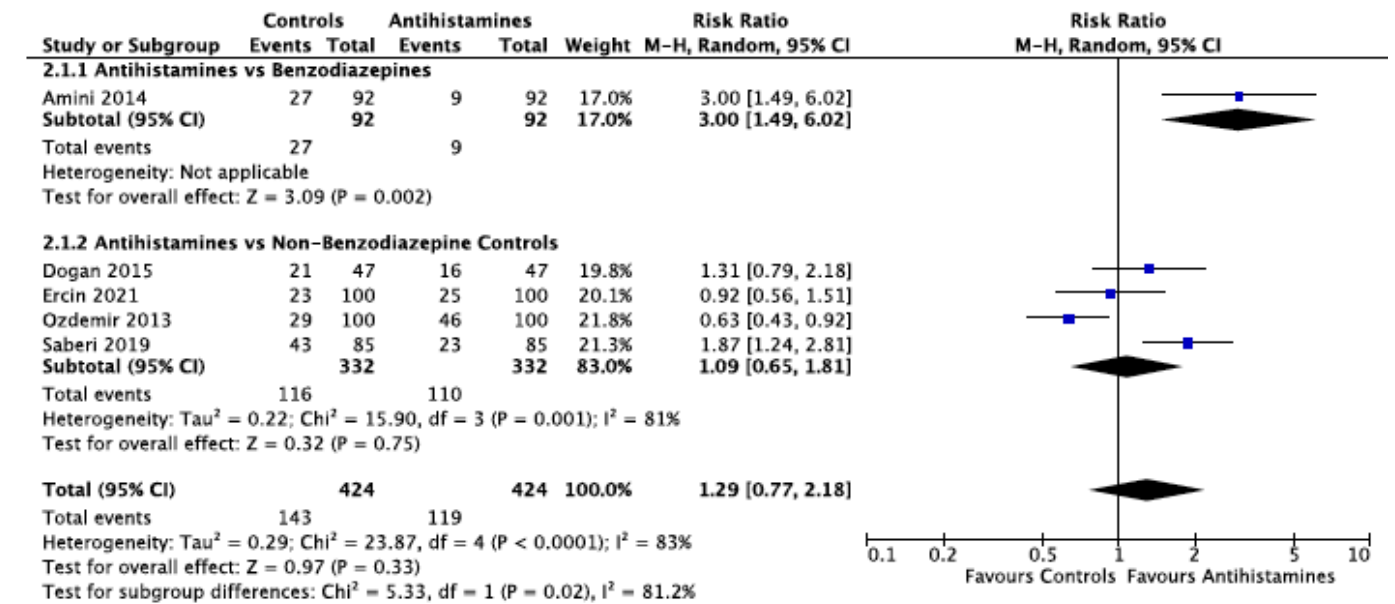

# eFigure 3. Antihistamines vs Placebo or No Treatment at 1 Week and 1 Month

## Improvement at 1 week

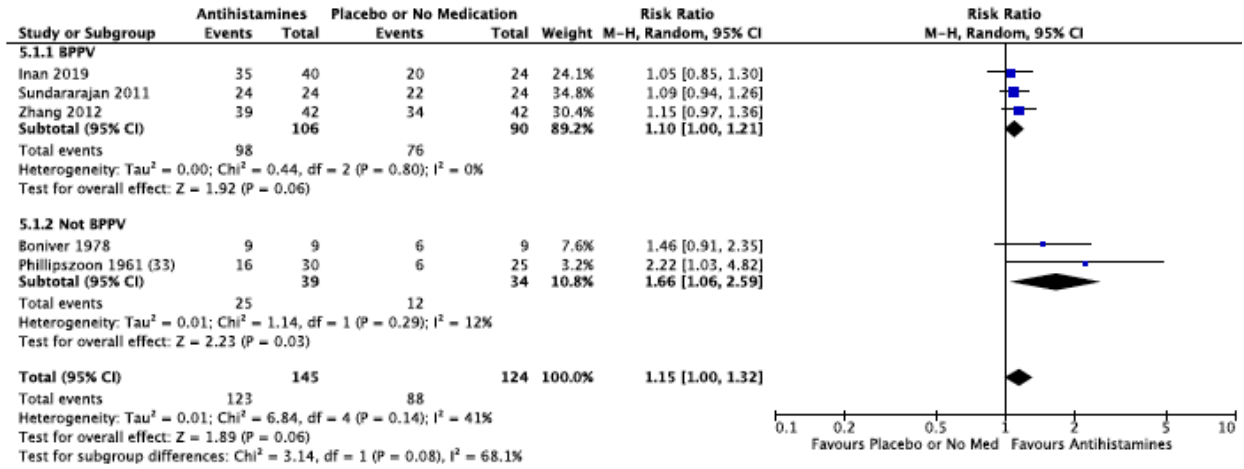

## Resolution at 1 week

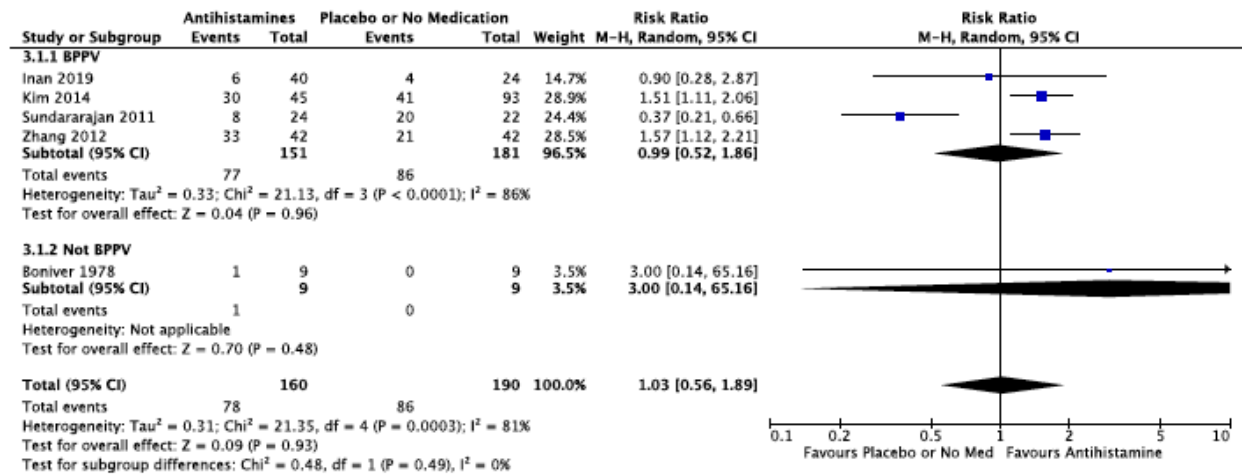

## Improvement at 1 month

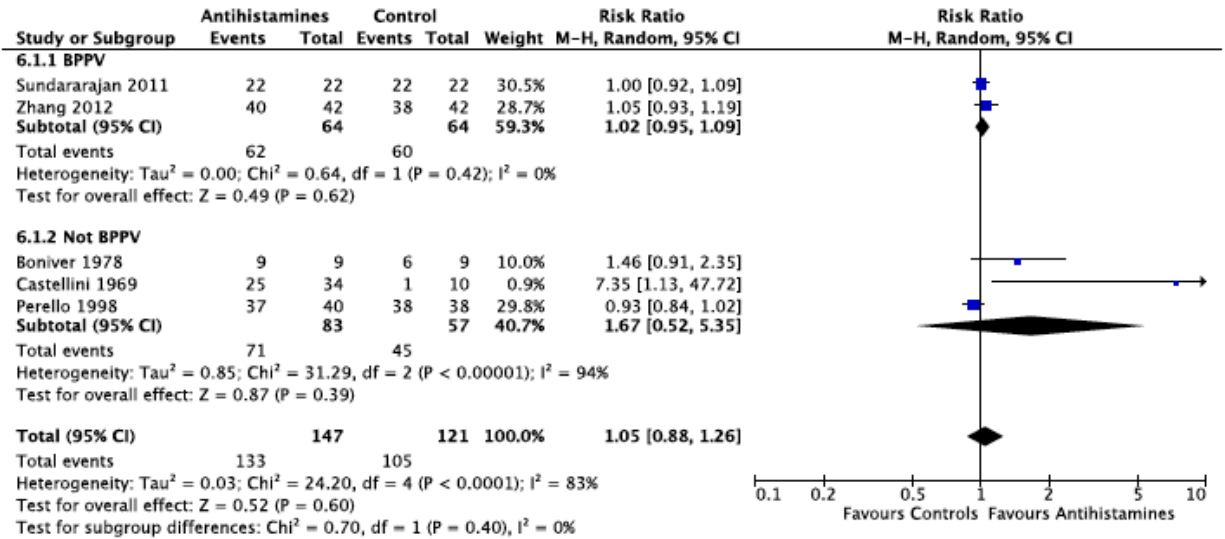

## Resolution at 1 month

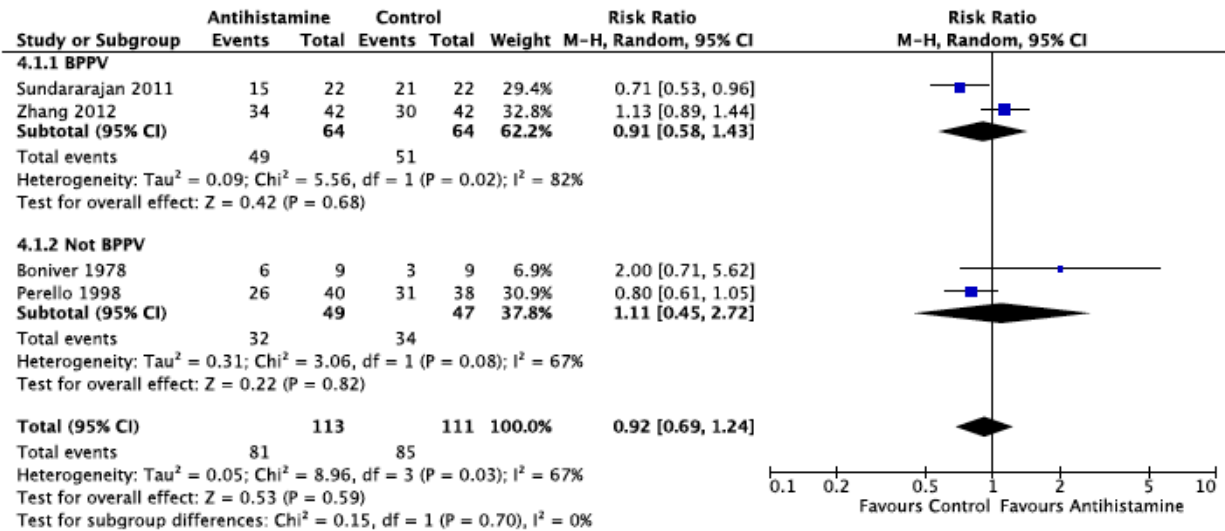



eFigure 4. Adverse Events

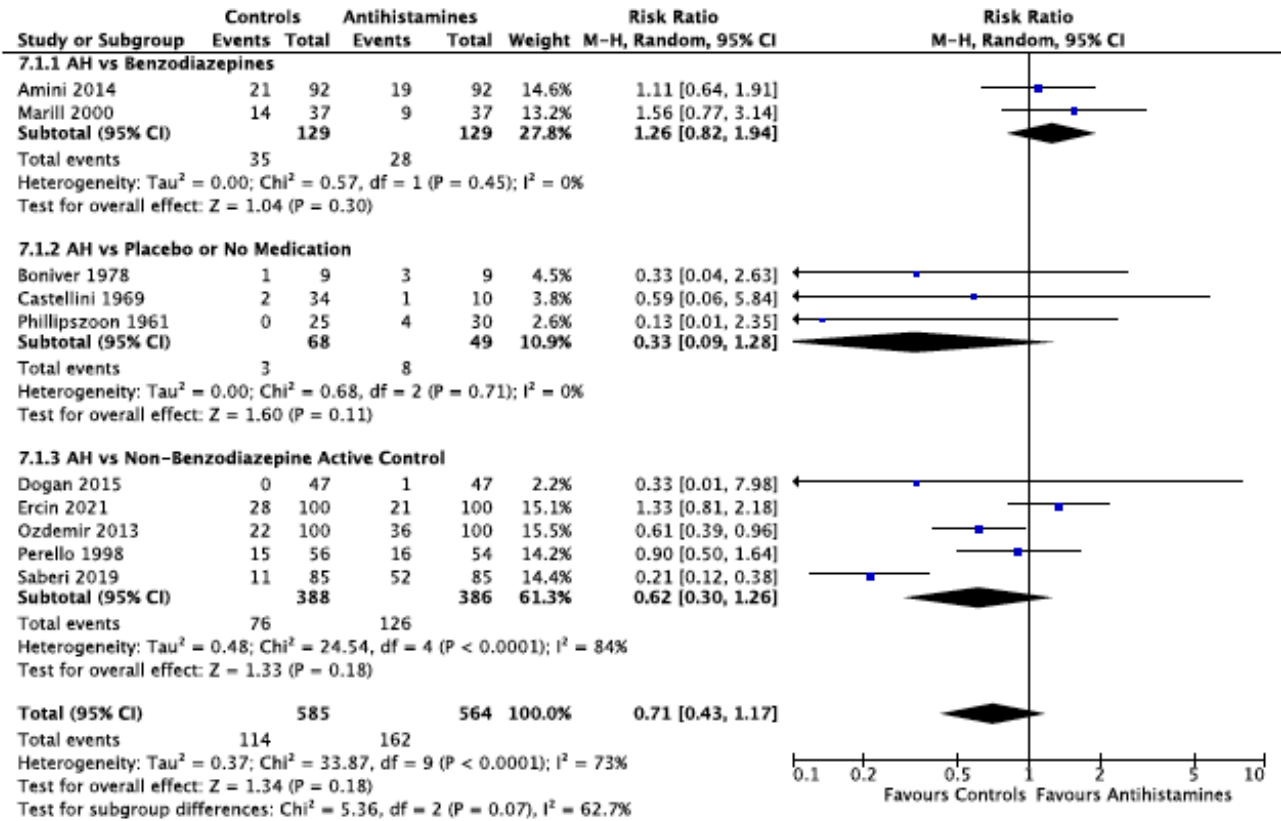

**eTable. Nystagmography Studies**

| Author, Year                   | N   | Comparators                                                                                                     | Type of Vertigo                                                             | Nystagmometry Results                                                                                                                                                                   |
|--------------------------------|-----|-----------------------------------------------------------------------------------------------------------------|-----------------------------------------------------------------------------|-----------------------------------------------------------------------------------------------------------------------------------------------------------------------------------------|
| Boniver, <sup>3</sup> 1978     | 18  | Flunarizine vs placebo for 3 months                                                                             | Central or “vascular”                                                       | Compared to placebo, flunarizine treatment resulted in significantly more improvement in duration and speed of nystagmus in rotation and caloric stimulation at 1 week through 3 months |
| Castellini, <sup>4</sup> 1969  | 44  | Cinnarizine vs placebo for up to 2 months                                                                       | Mixed, including Meniere’s, traumatic, “labyrinthopathy” and unknown causes | Nystagmus “Improved” in 27 of 31 treated with cinnarizine, and 0 of 9 treated with placebo                                                                                              |
| McClure, <sup>5</sup> 1980     | 20  | Lorazepam vs diazepam vs placebo for 1 month                                                                    | Benign positional vertigo                                                   | Nystagmus, as rated by an examiner on a 10 point scale, decreased by 3.17 placebo, 3.57 diazepam, and 3.00 lorazepam at 1 month, no significant differences                             |
| Mulch, <sup>6</sup> 1976*      | 50  | Dimenhydrinate vs diazepam vs high dose sulphiride vs low dose sulphiride vs placebo, single intramuscular dose | 37 “peripheral,” 12 “central,” 1 undetermined                               | Dimenhydrinate and high dose sulphiride significantly decreased nystagmus intensity compared to placebo at 48 minutes; low dose sulphiride and diazepam did not                         |
| Perello, <sup>7</sup> 1998     | 110 | Cinnarizine vs dotarizine for 45 days                                                                           | Sudden onset “vertiginous syndromes”                                        | No differences for either group in oculomotor or postural vestibular tests with respect to baseline                                                                                     |
| Philipszoon, <sup>8</sup> 1961 | 55  | Cinnarizine vs placebo for 1 week                                                                               | Not specified                                                               | “Cinnarizine exerted a significant effect compared to placebo” on nystagmometry in patients with vestibular vertigo                                                                     |

\*Mulch 1976 is not included in quantitative meta-analysis because no clinical or symptom-based outcomes were reported

## eReferences

1. Shafipour LKI, Shafipour V, Ahidashti HA, Charati JY. Intravenous promethazine versus diazepam for treatment of peripheral vertigo in emergency department. *J Mazandaran Univ Med Sci.* 2017;27(149):88-98.
2. Ozdemir H, Akinci E, Coskun F. Comparison of the effectiveness of intravenous piracetam and intravenous dimenhydrinate in the treatment of acute peripheral vertigo in the emergency department. *Singapore Med J.* 2013;54(11):649-652.
3. Boniver R. Vertigo, particularly of vascular origin, treated with flunarizine (R 14 950). *Arzneimittelforschung.* 1978;28(10):1800-1804.
4. Castellini V. [Clinical and electronystagmographic experience with a new drug containing cinnarizine in the treatment of vertigo]. *Boll Mal Orecch Gola Naso.* 1969;87(2):107-131.
5. McClure JA, Willett JM. Lorazepam and diazepam in the treatment of benign paroxysmal vertigo. *J Otolaryngol.* 1980;9(6):472-477.
6. Mulch G. Comparison of the effectiveness of antivertiginous drugs by double blind procedure. The effect of diazepam, dimenhydrinate and sulpirid on the human vestibular spontaneous nystagmus. *Laryngol Rhinol Otol (Stuttg).* 1976;55(5):392-399.
7. Perelló E, Esteller E, Colls A, et al. [Efficacy and safety of dotarizine vs. cinnarizine in the symptomatic treatment of acute balance disorders (common vertigo)]. *An Otorrinolaringol Ibero Am.* 1998;25(3):291-310.
8. Philipszoon AJ. [The effect of cinnarizine on vertigo; an electronystagmographic examination in 55 patients]. *Ned Tijdschr Geneeskd.* 1961;105:657-660.
